# Supplementary material for: Discovery of Novel Pyridazine-Based Cyclooxygenase-2 Inhibitors with a Promising Gastric Safety Profile
Source: MDPI journal article supplement (doi:10.3390/molecules25092002), 2020-04-25
Supplement: s1 [file s1]

Supplementary Data

# Discovery of Novel Pyridazine Based Cyclooxygenase-2 Inhibitors With Promising Gastric Safety Profile

Abida Khan <sup>1,\*</sup>, Anupama Diwan <sup>1</sup>, Hamdy K Thabet <sup>2</sup>, Mohd Imran <sup>3</sup>, and Md. Afroz Bakht <sup>4</sup>

<sup>1</sup> School of Pharmaceutical Sciences, Apeejay Stya University, Sohna - Palwal Road, Sohna – 122103, India

<sup>2</sup> Department of Chemistry, Faculty of Science, Northern Border University, Rafha 91911, PO Box 840, Saudi Arabia

<sup>3</sup> Department of Pharmaceutical Chemistry, Faculty of Pharmacy, Northern Border University, Rafha 91911, Saudi Arabia

<sup>4</sup> Department of Chemistry, College of Science and Humanities in Al-Kharj, Prince Sattam Bin Abdulaziz University, Al-Kharj 11942, Saudi Arabia

\* Correspondence: aqua\_abkhan@yahoo.com; Tel.: +91-8053027613

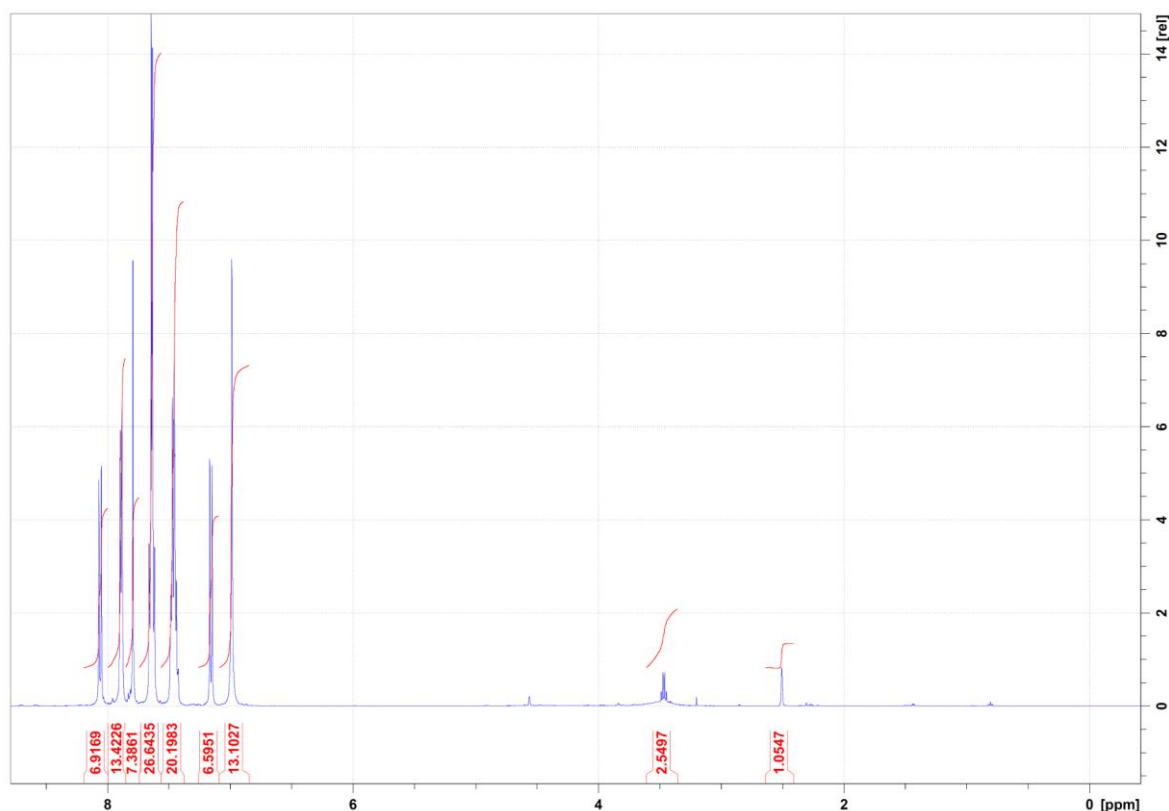

Figure 1. <sup>1</sup>H-NMR spectrum of Compound 4a.

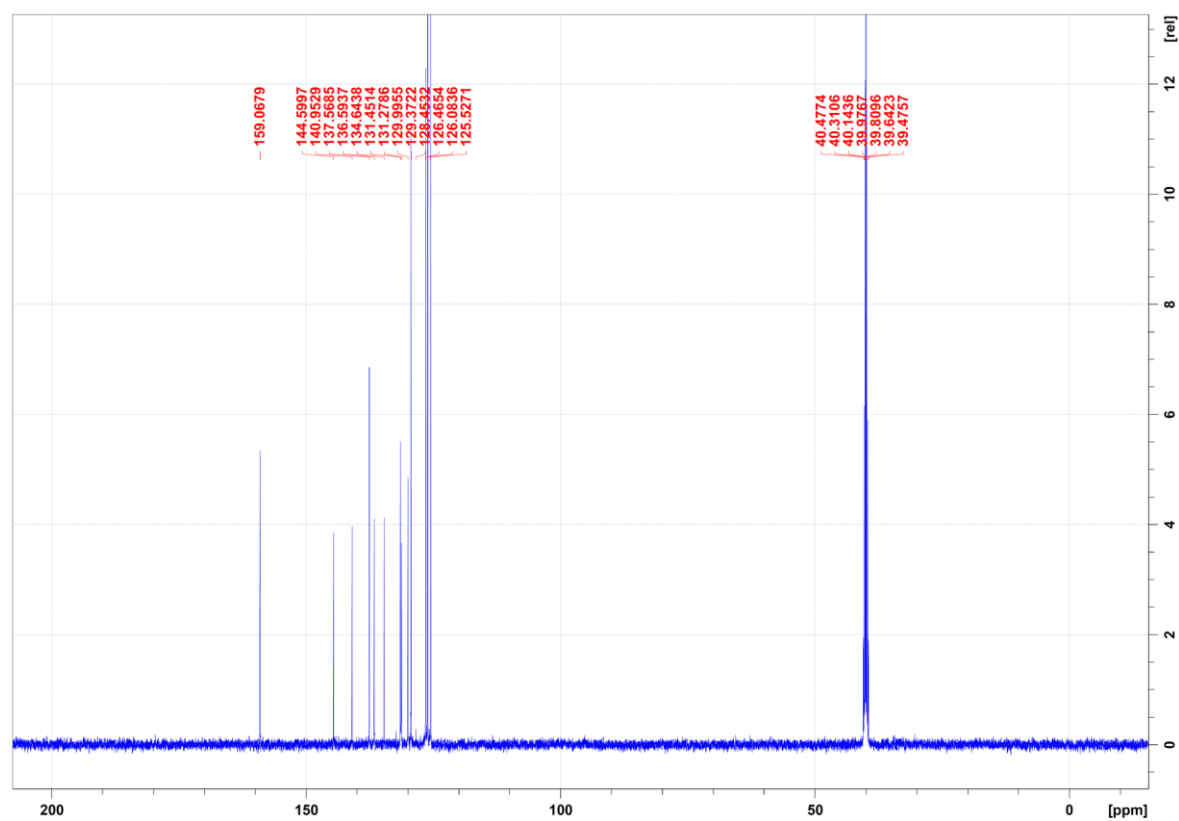Figure 2. <sup>13</sup>C-NMR spectrum of Compound 4a.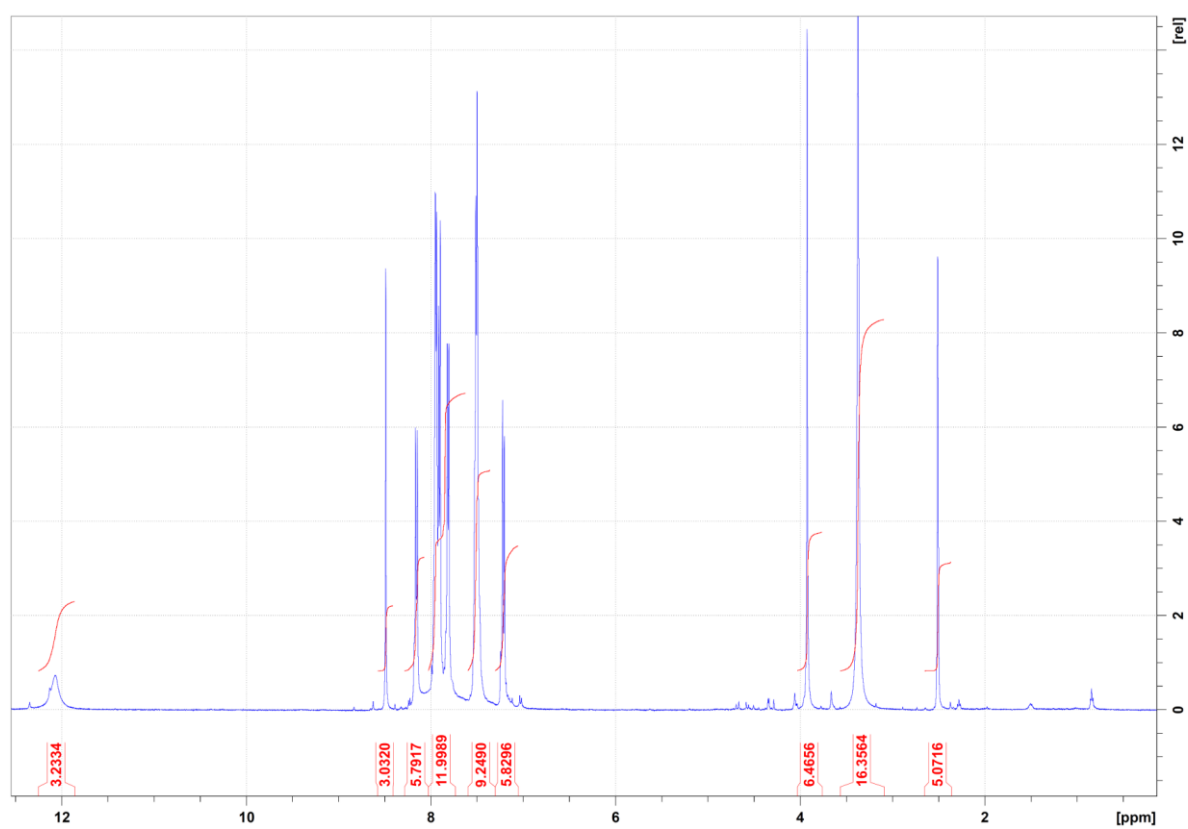Figure 3. <sup>1</sup>H-NMR spectrum of Compound 6a.

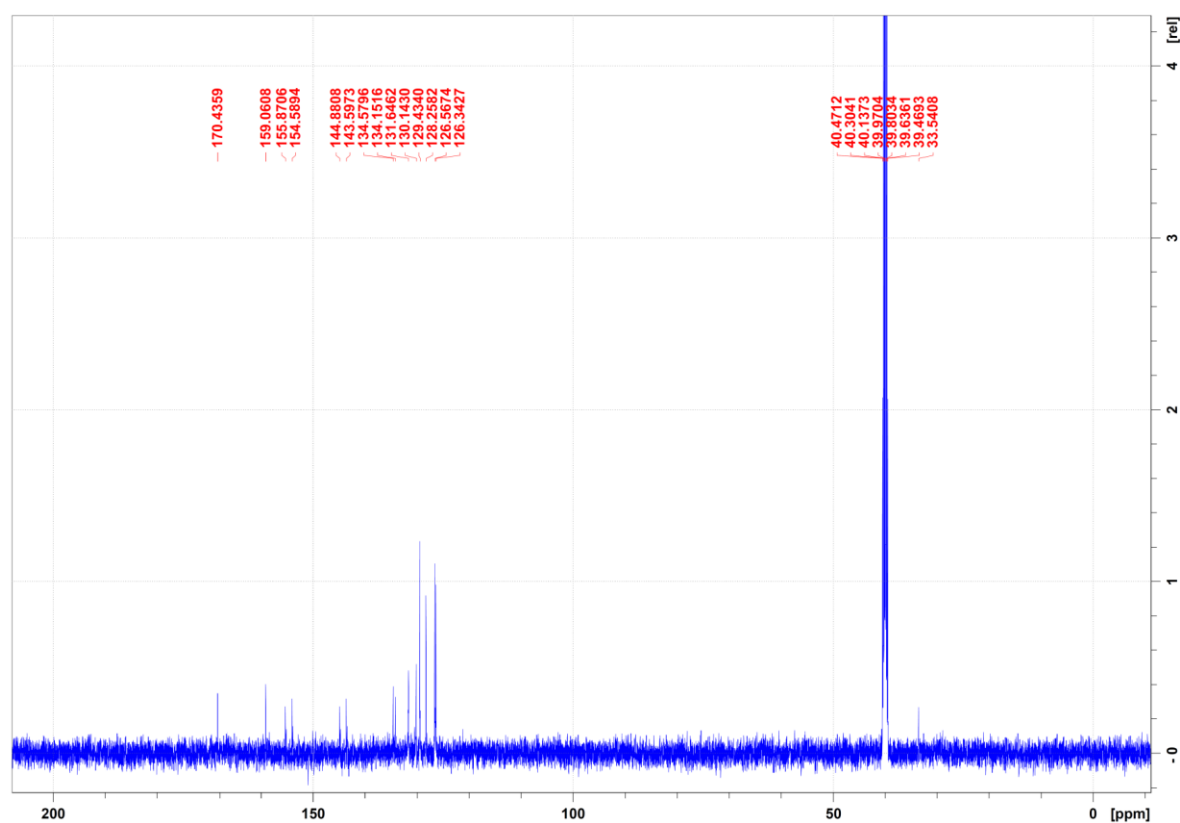

Figure 4.  $^{13}\text{C}$ -NMR spectrum of Compound 6a.

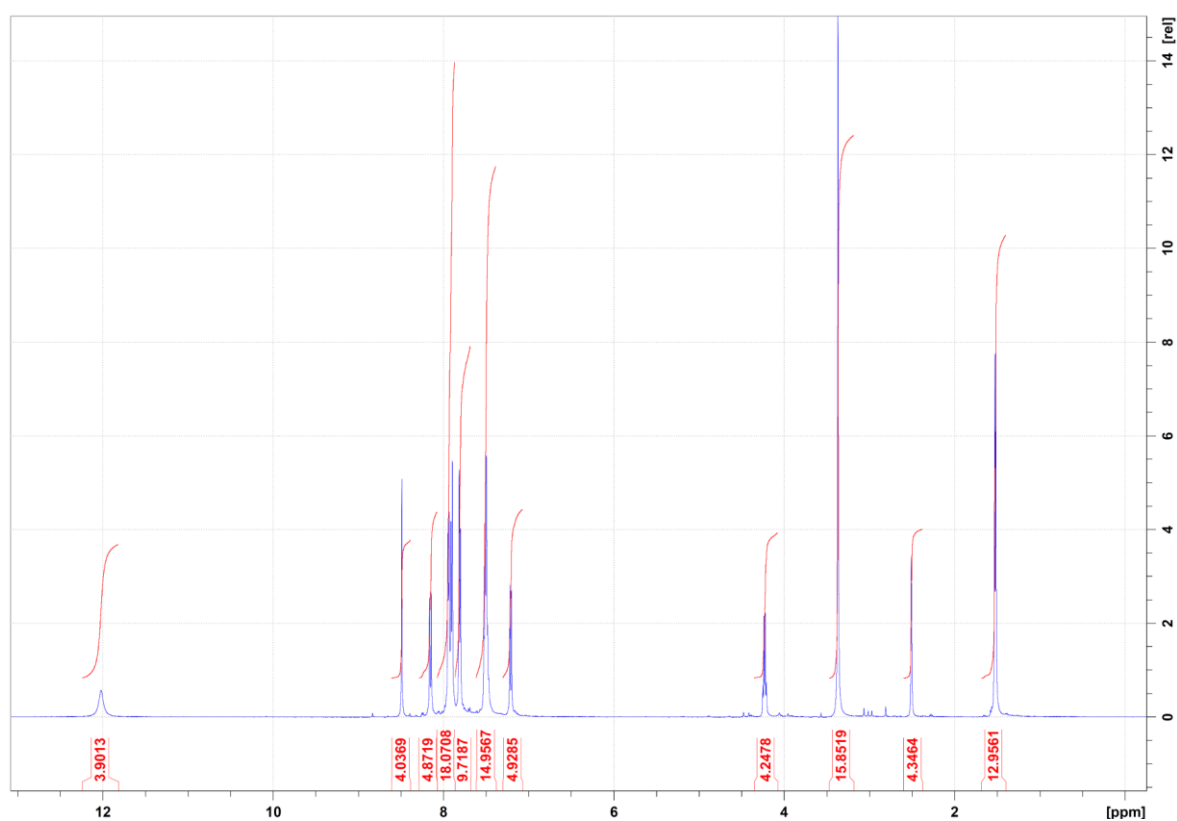

Figure 5.  $^1\text{H}$ -NMR spectrum of Compound 6b.

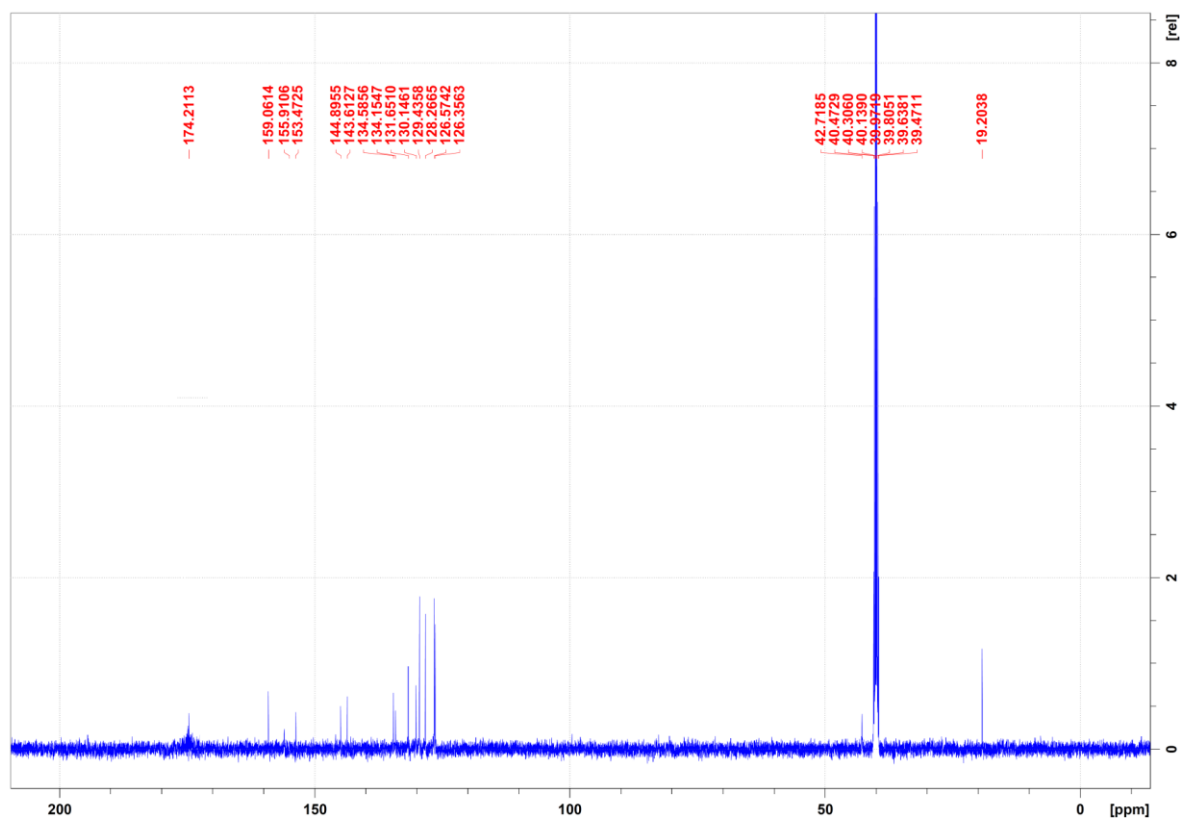Figure 6. <sup>13</sup>C-NMR spectrum of Compound 6b.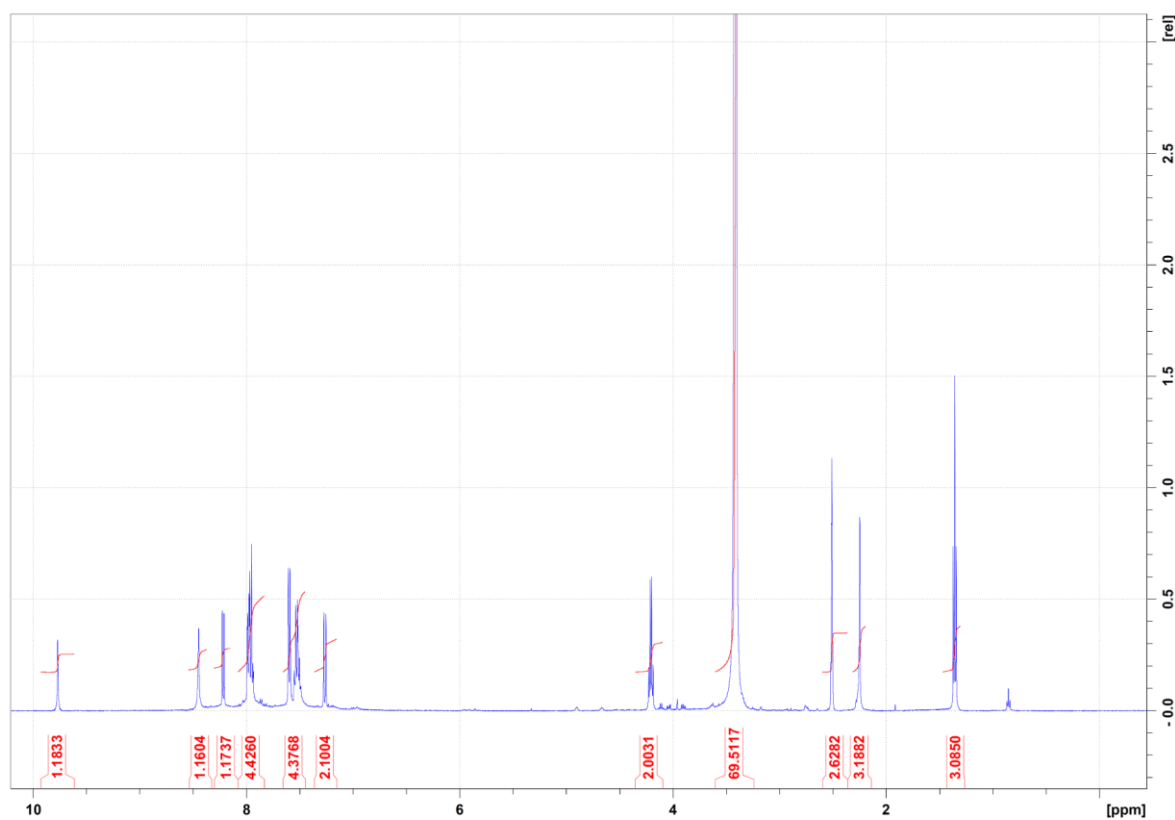Figure 7. <sup>1</sup>H-NMR spectrum of Compound 8.

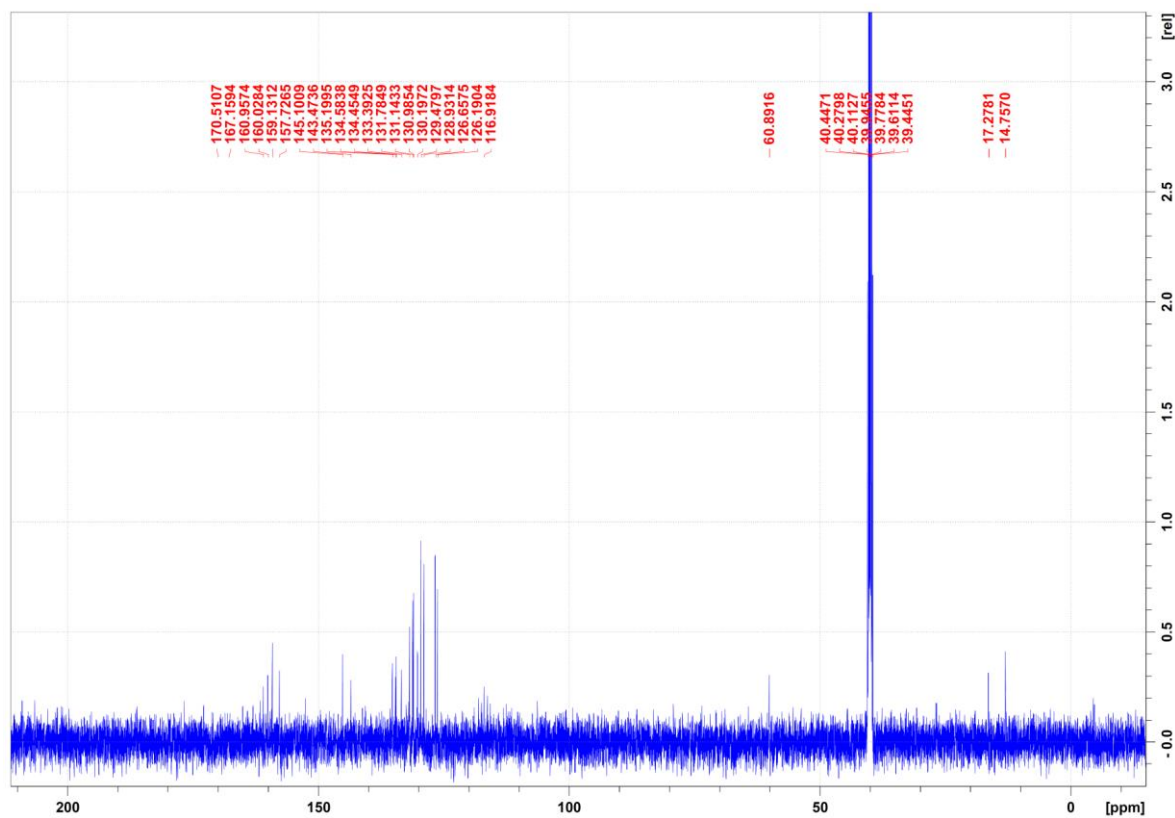Figure 8. <sup>13</sup>C-NMR spectrum of Compound 8.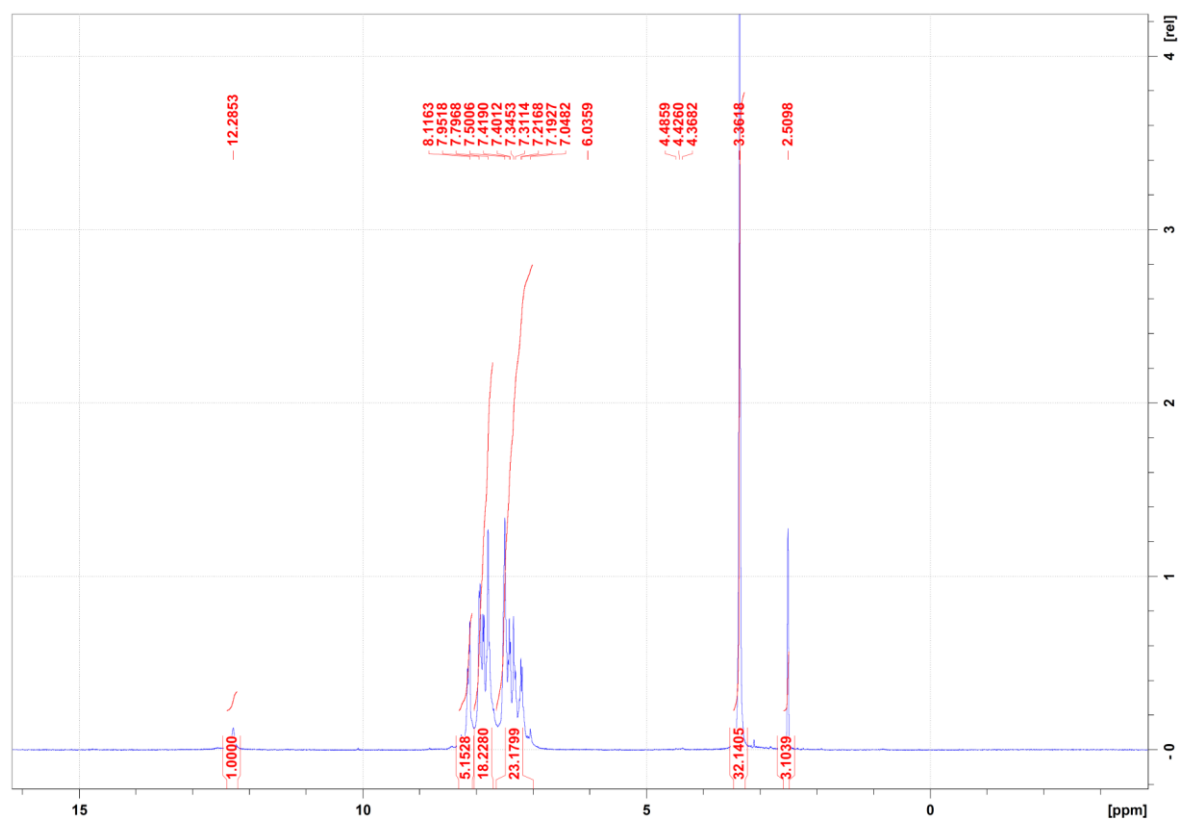Figure 9. <sup>1</sup>H-NMR spectrum of Compound 9a.

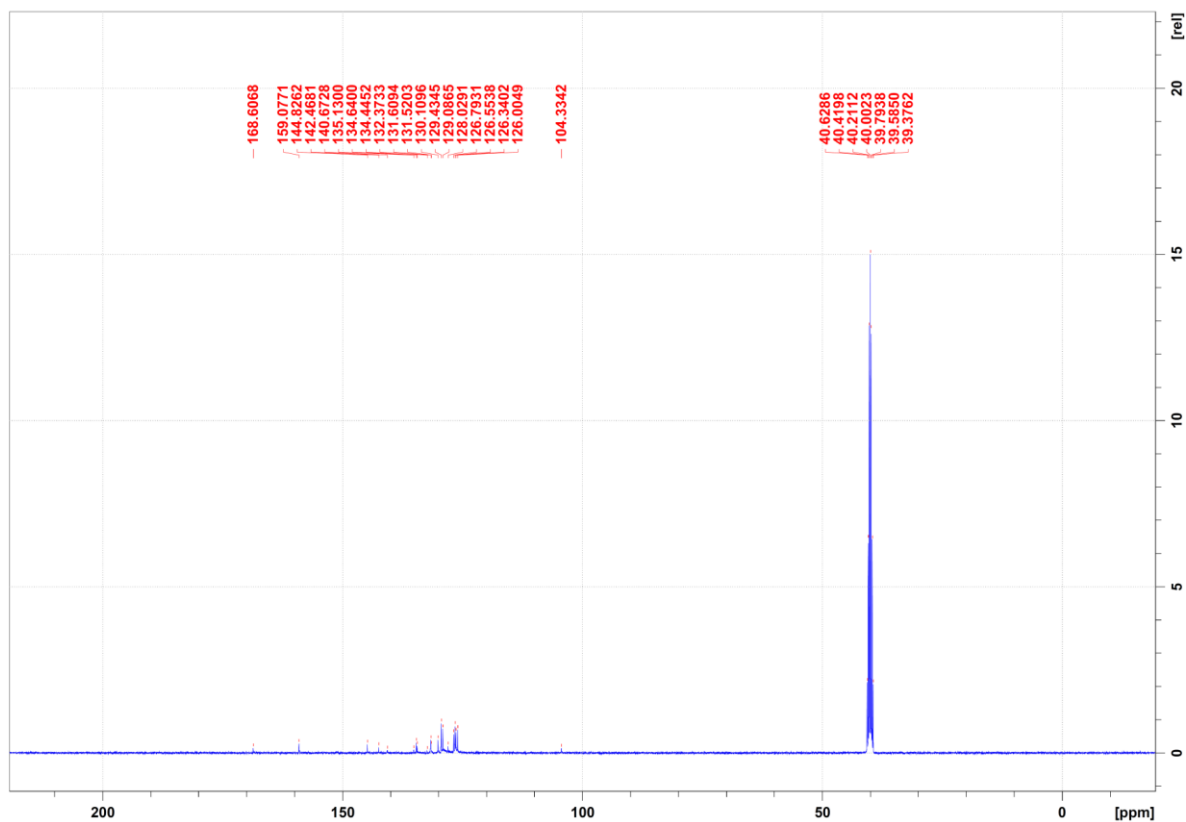Figure 10. <sup>13</sup>C-NMR spectrum of Compound 9a.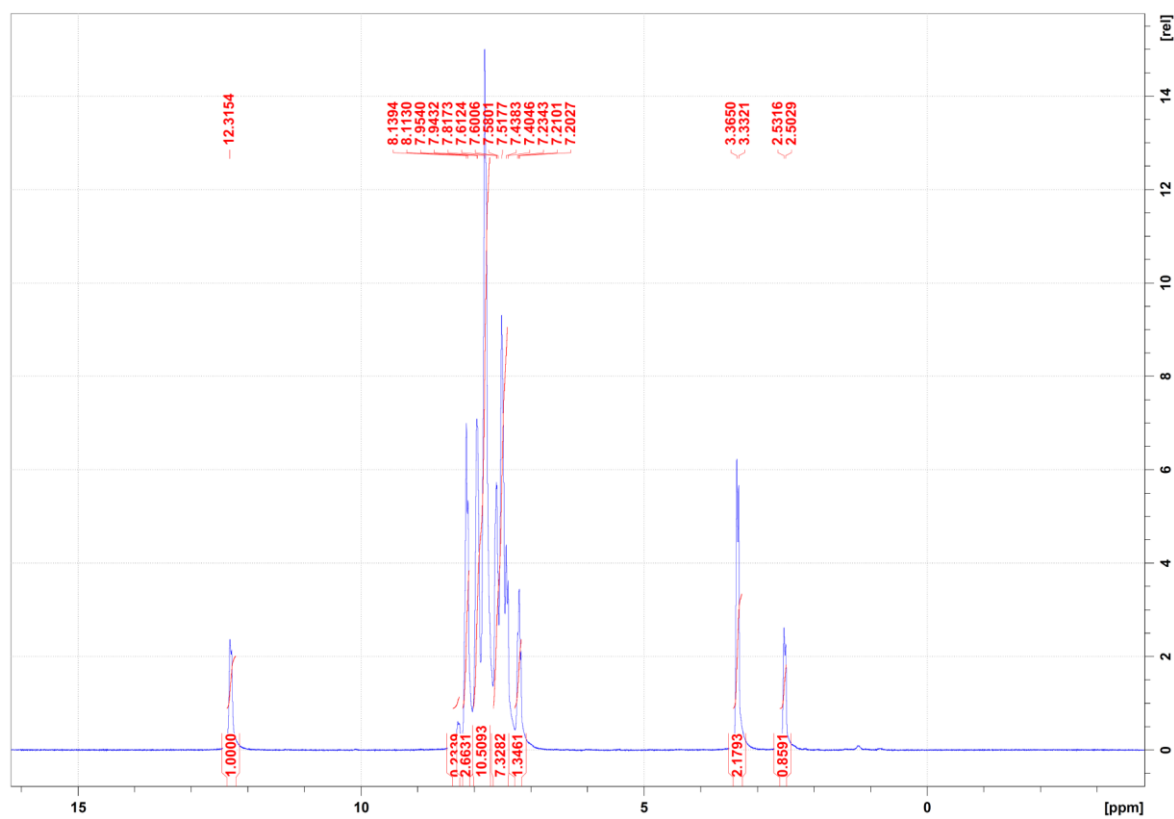Figure 11. <sup>1</sup>H-NMR spectrum of Compound 9b.

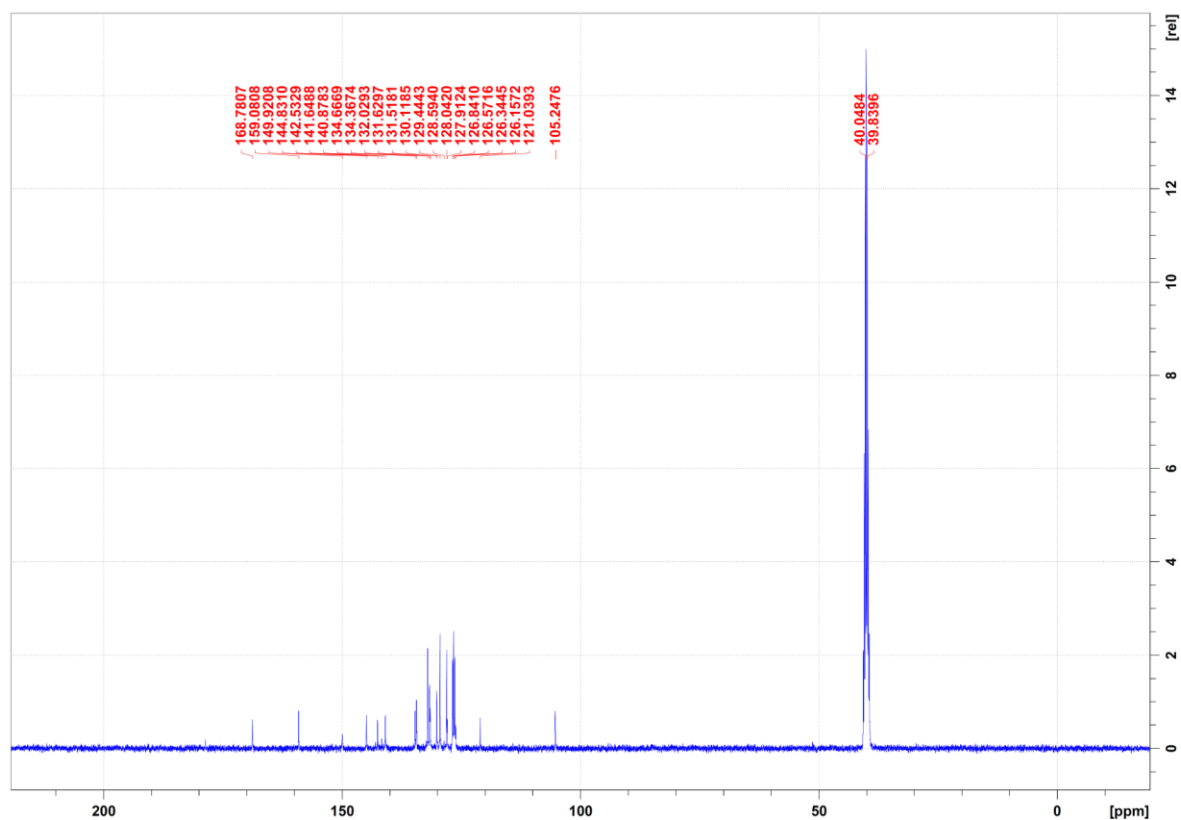

Figure 12.  $^{13}\text{C}$ -NMR spectrum of Compound 9b.

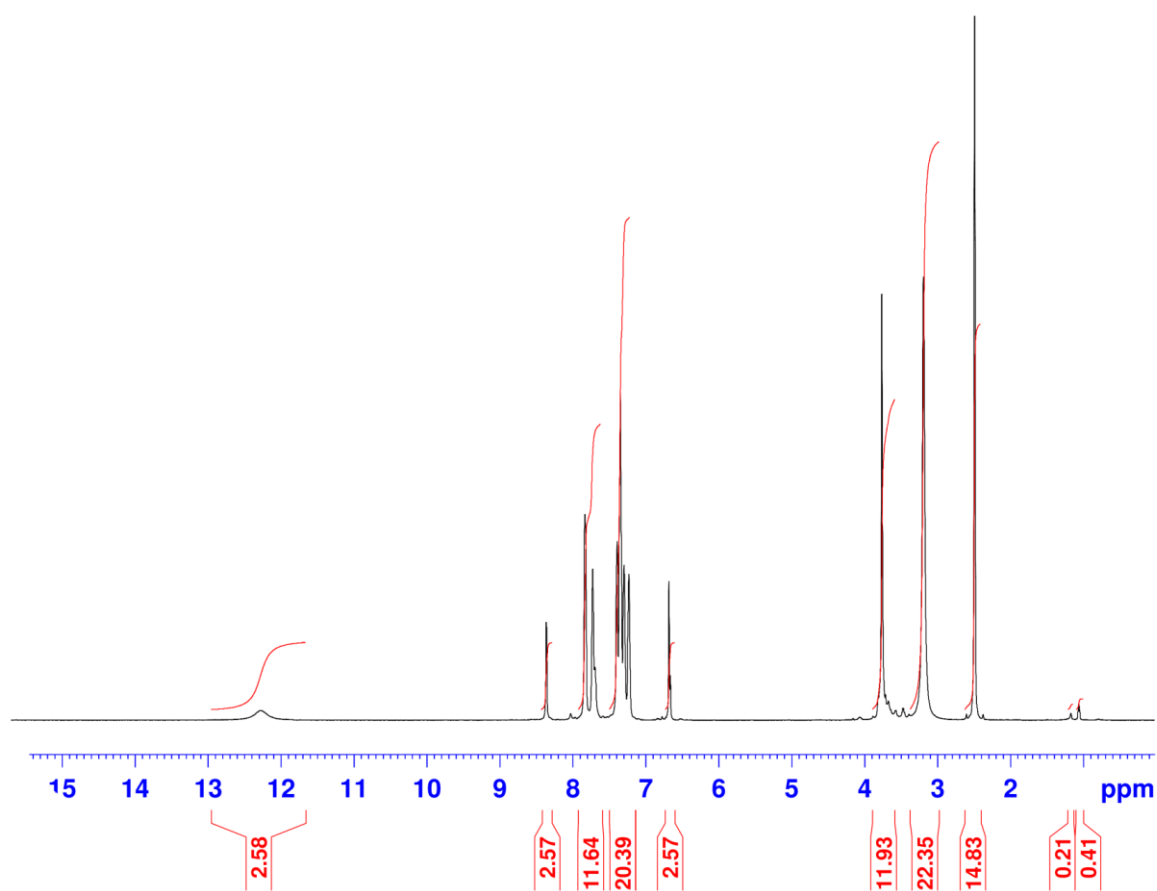

Figure 13.  $^1\text{H}$ -NMR spectrum of Compound 10.

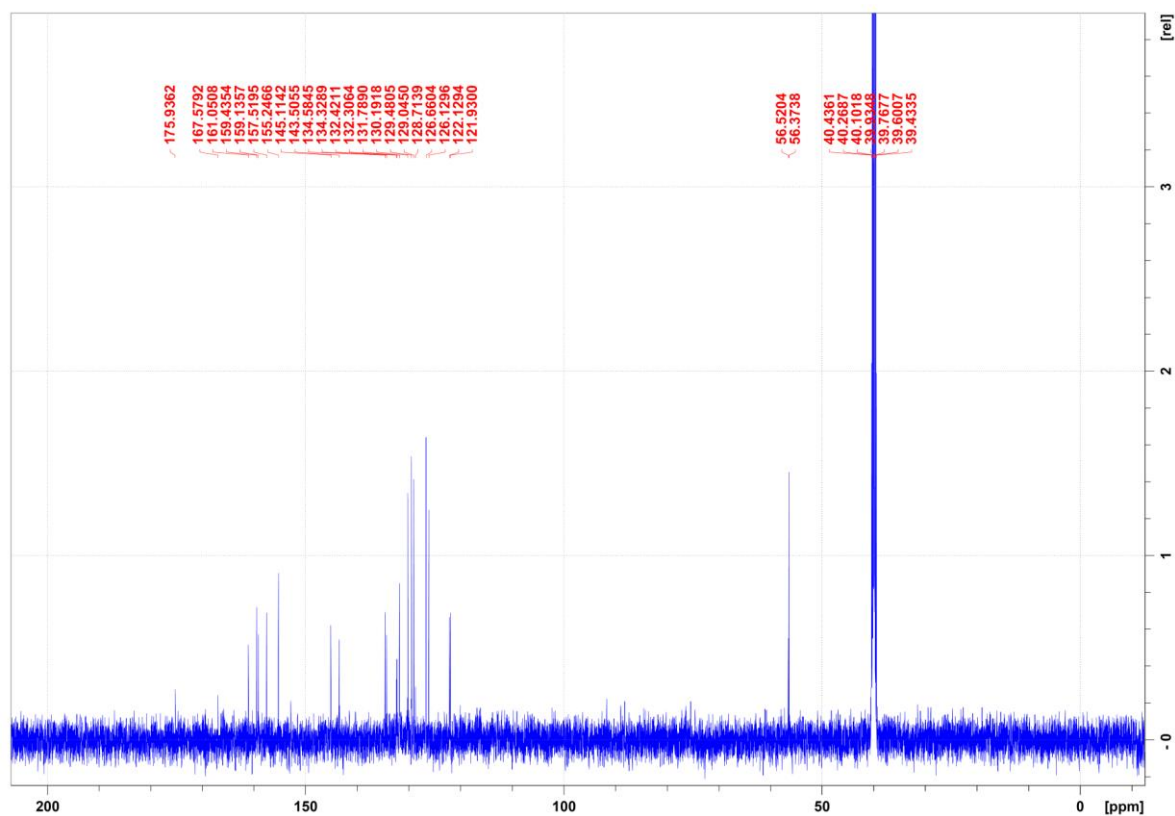Figure 14. <sup>13</sup>C-NMR spectrum of Compound 10.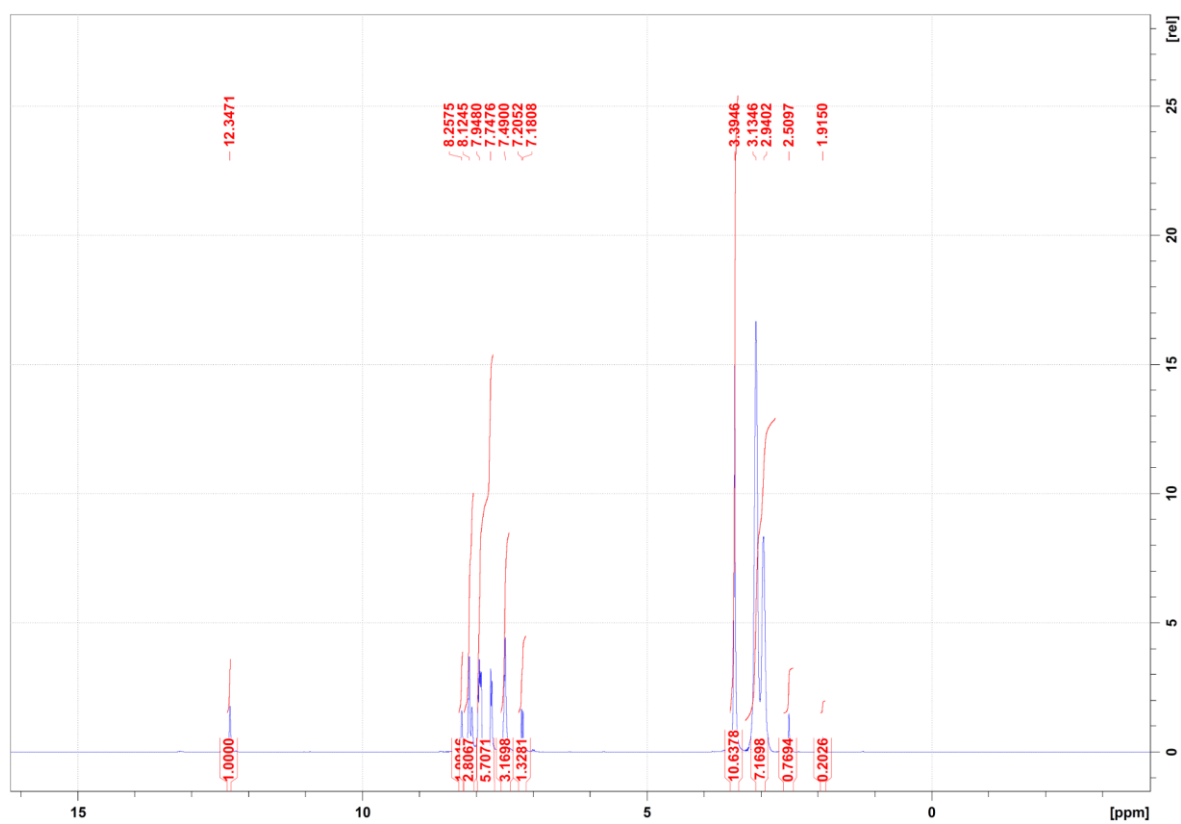Figure 15. <sup>1</sup>H-NMR spectrum of Compound 11.



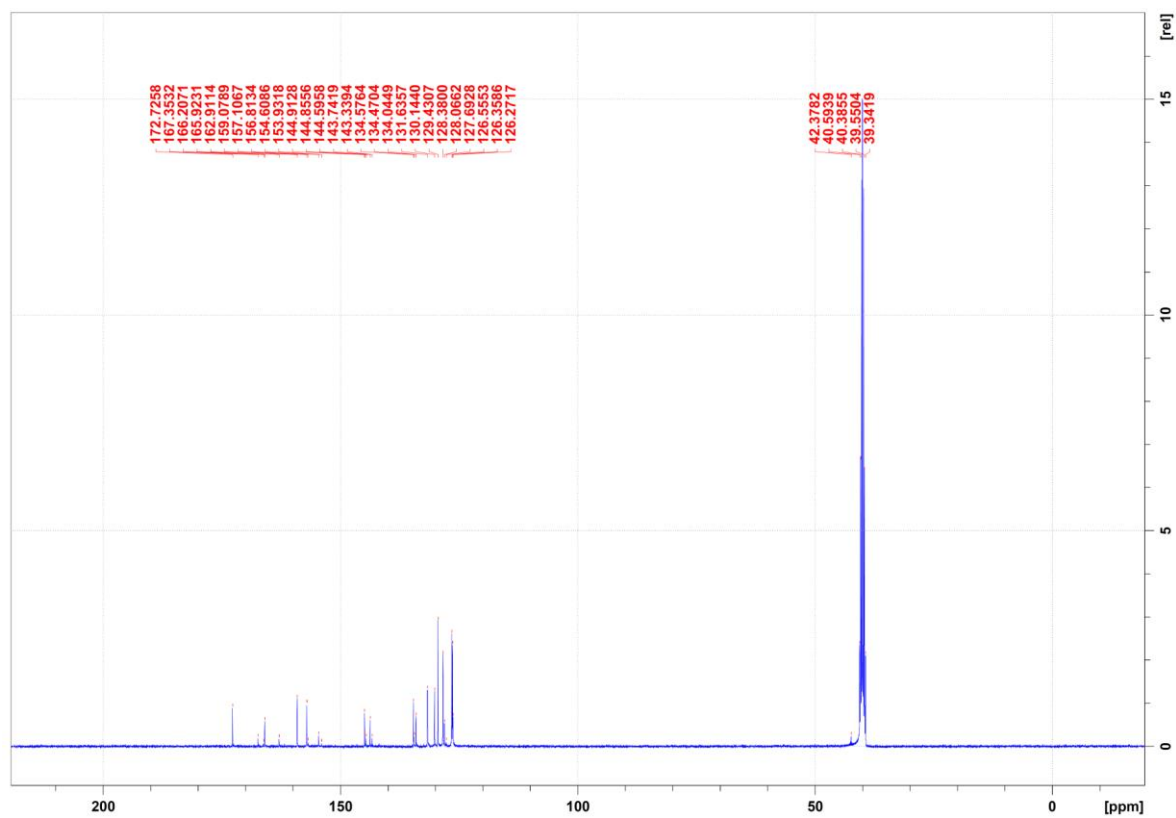Figure 16. <sup>13</sup>C-NMR spectrum of Compound 11.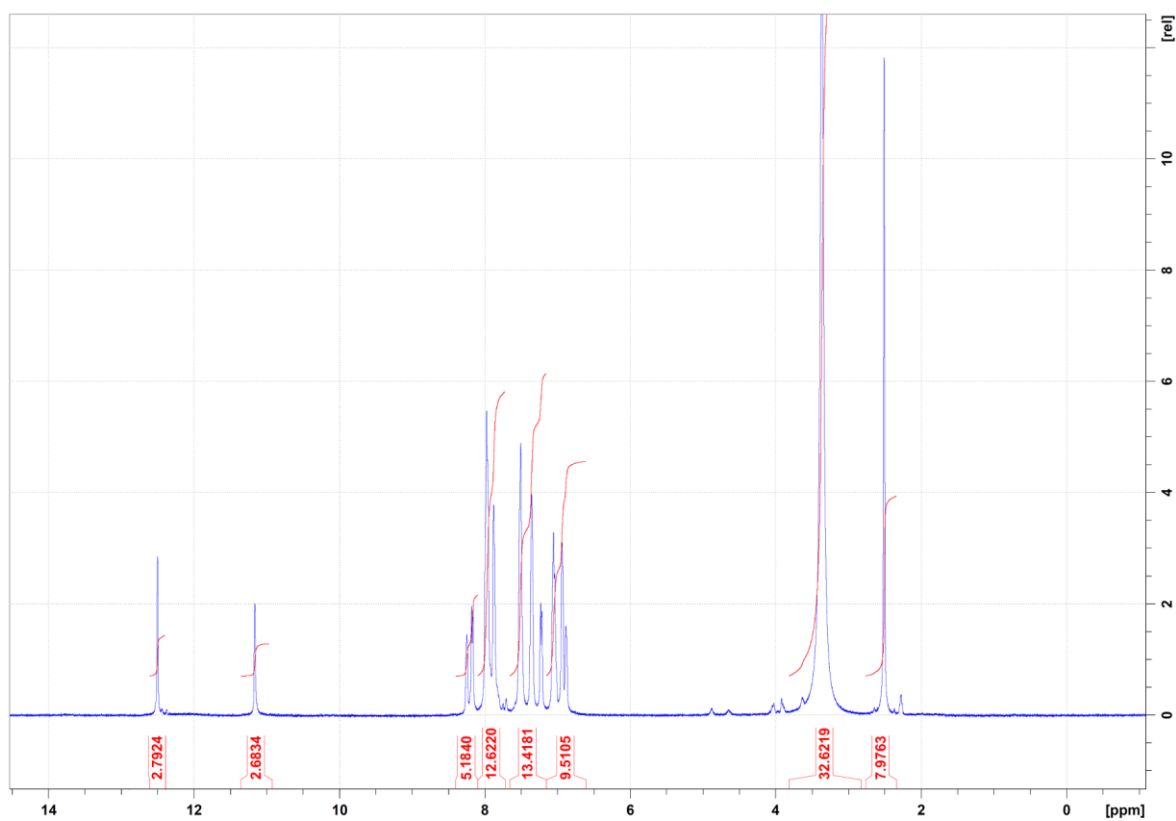Figure 17. <sup>1</sup>H-NMR spectrum of Compound 12.

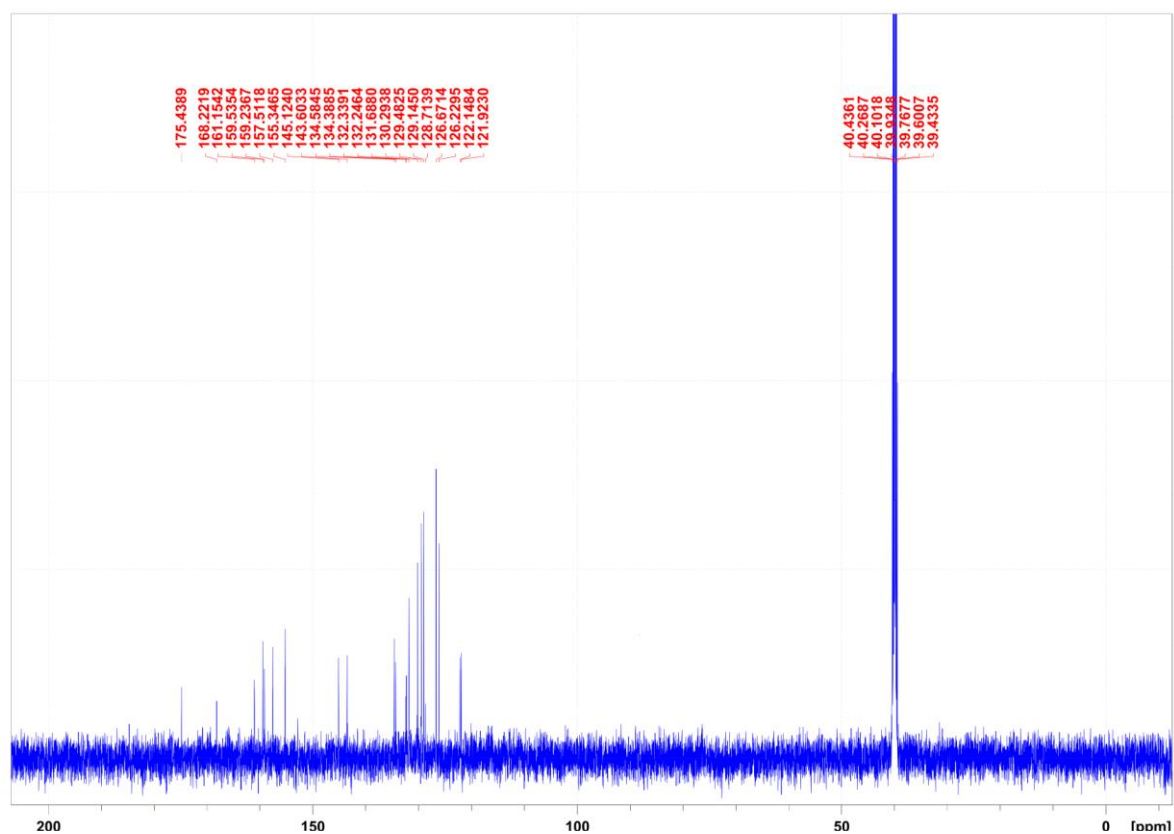Figure 18.  $^{13}\text{C}$ -NMR spectrum of Compound 12.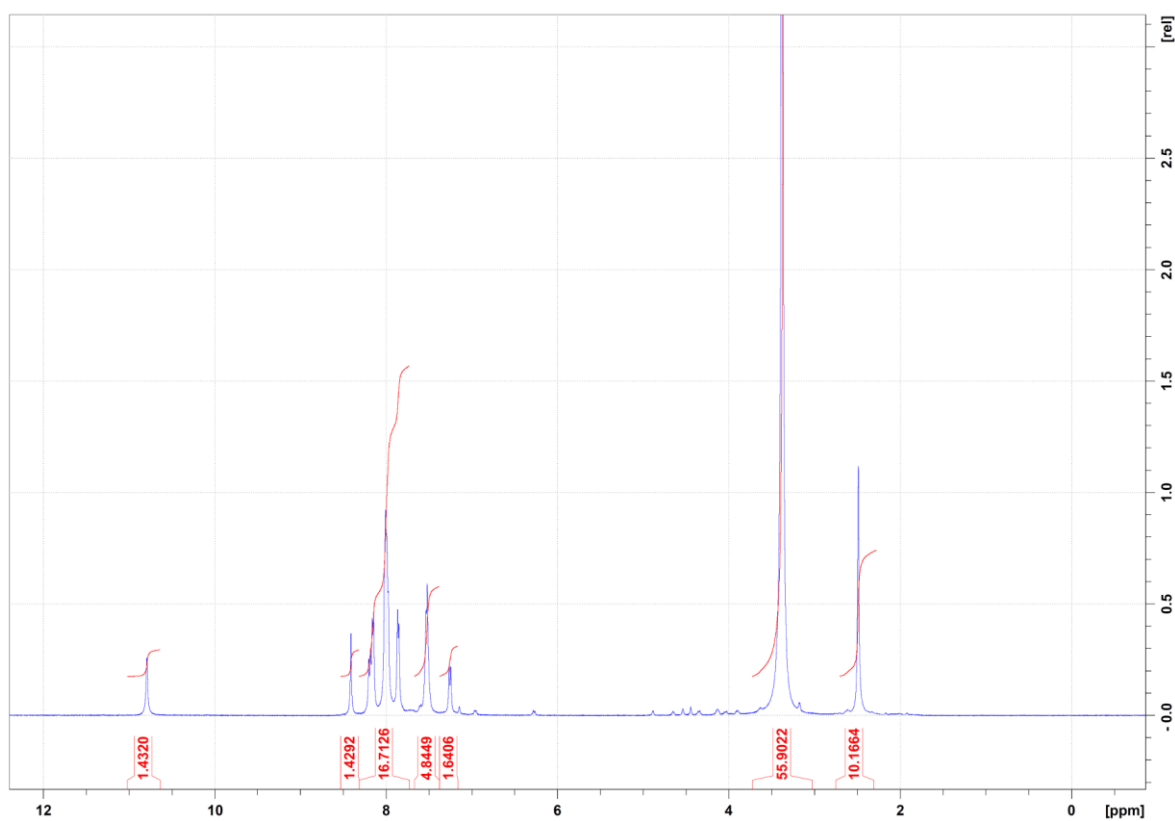Figure 19.  $^1\text{H}$ -NMR spectrum of Compound 16a.

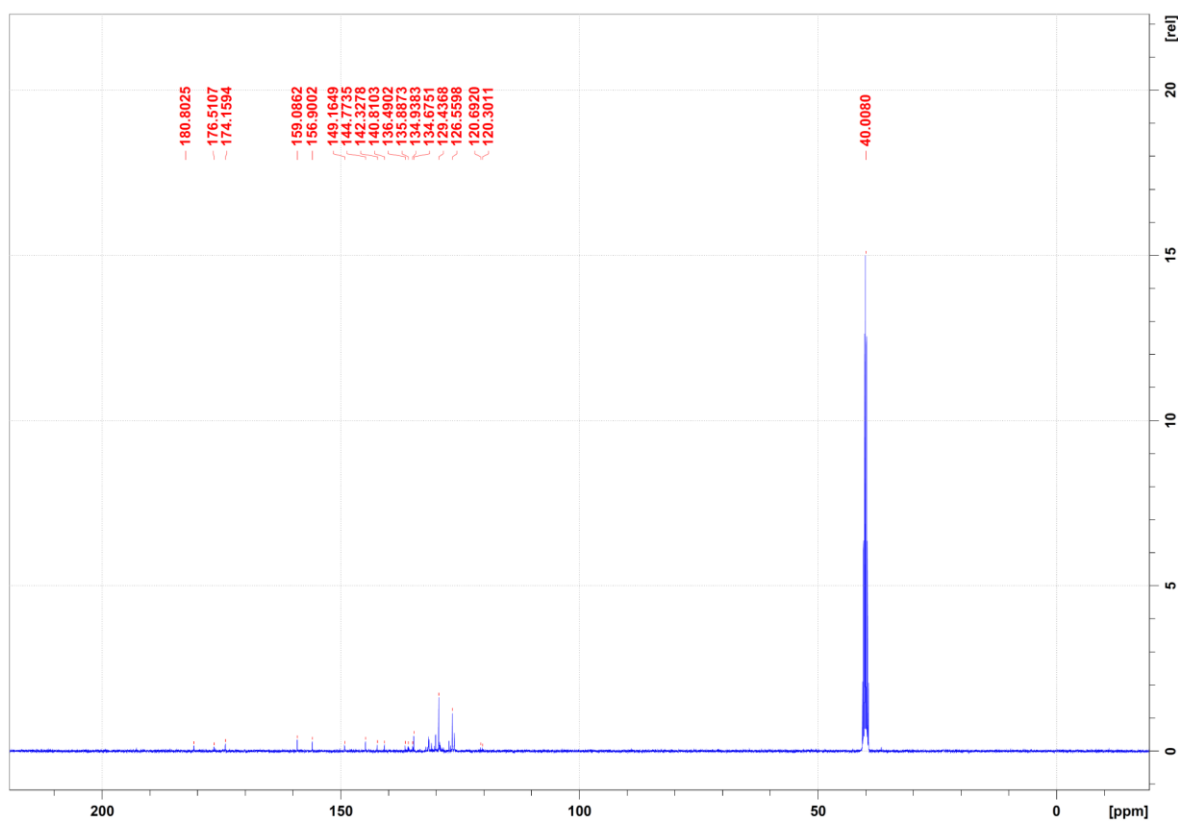

Figure 20. <sup>13</sup>C-NMR spectrum of Compound 16a.

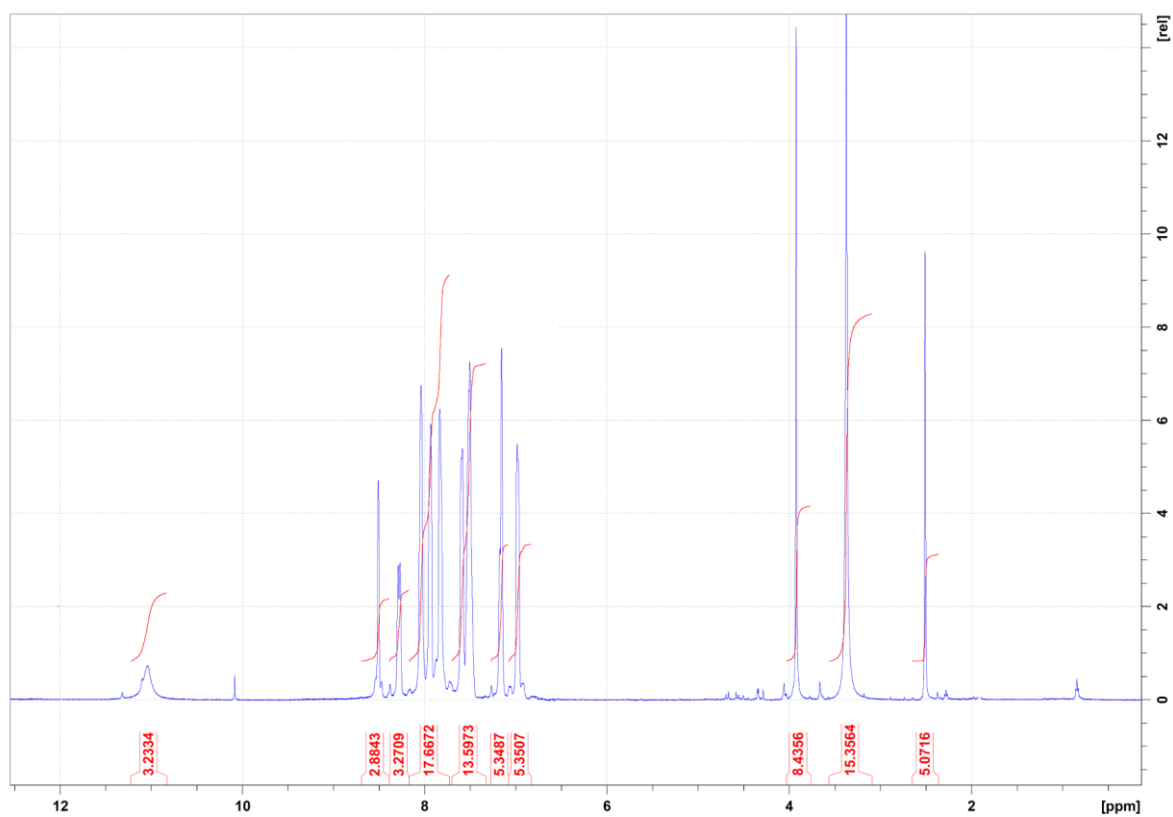

Figure 21. <sup>1</sup>H-NMR spectrum of Compound 16b.

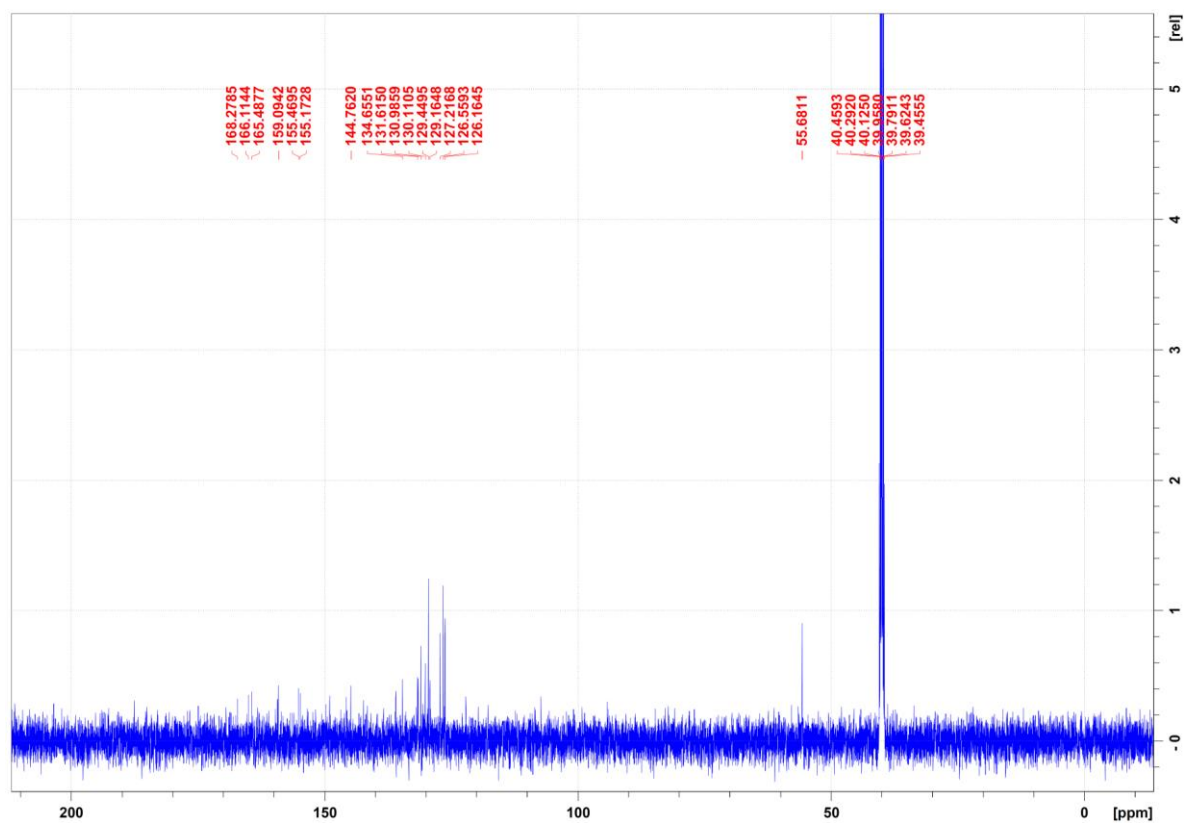

Figure 22. <sup>13</sup>C-NMR spectrum of Compound 16b.

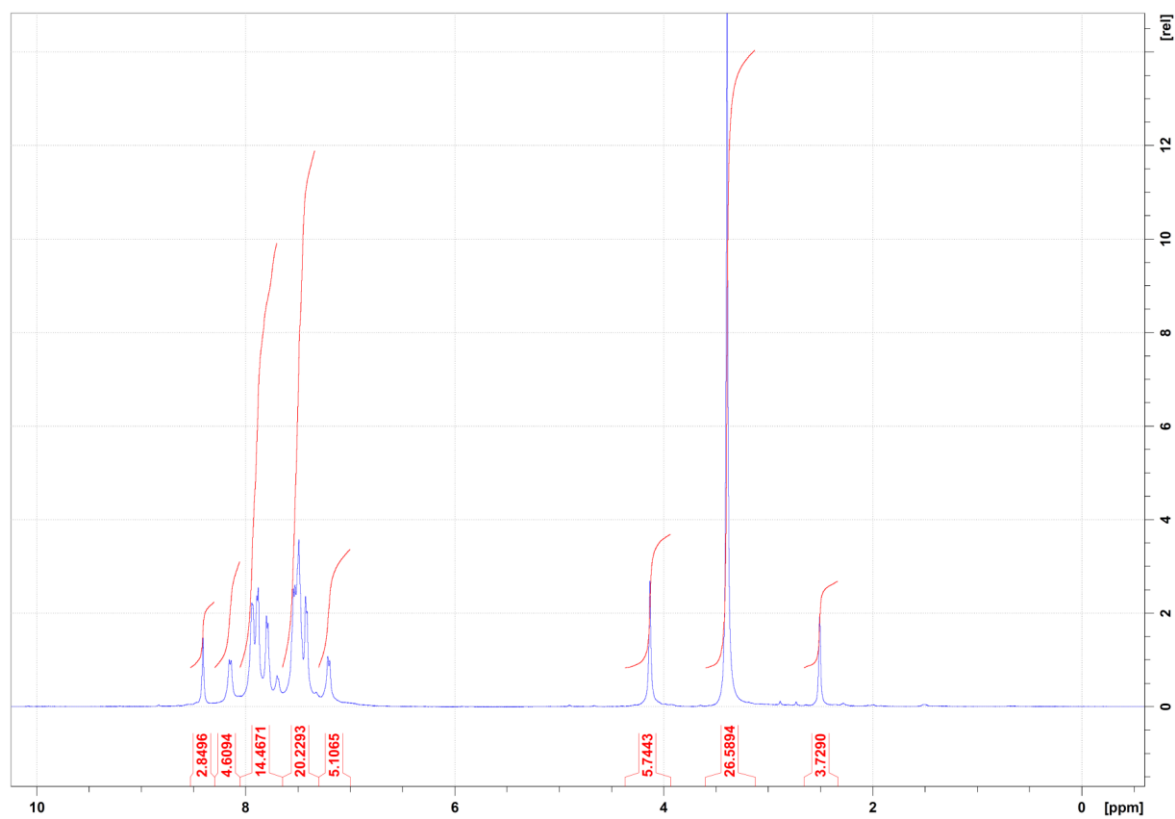

Figure 23. <sup>1</sup>H-NMR spectrum of Compound 17.

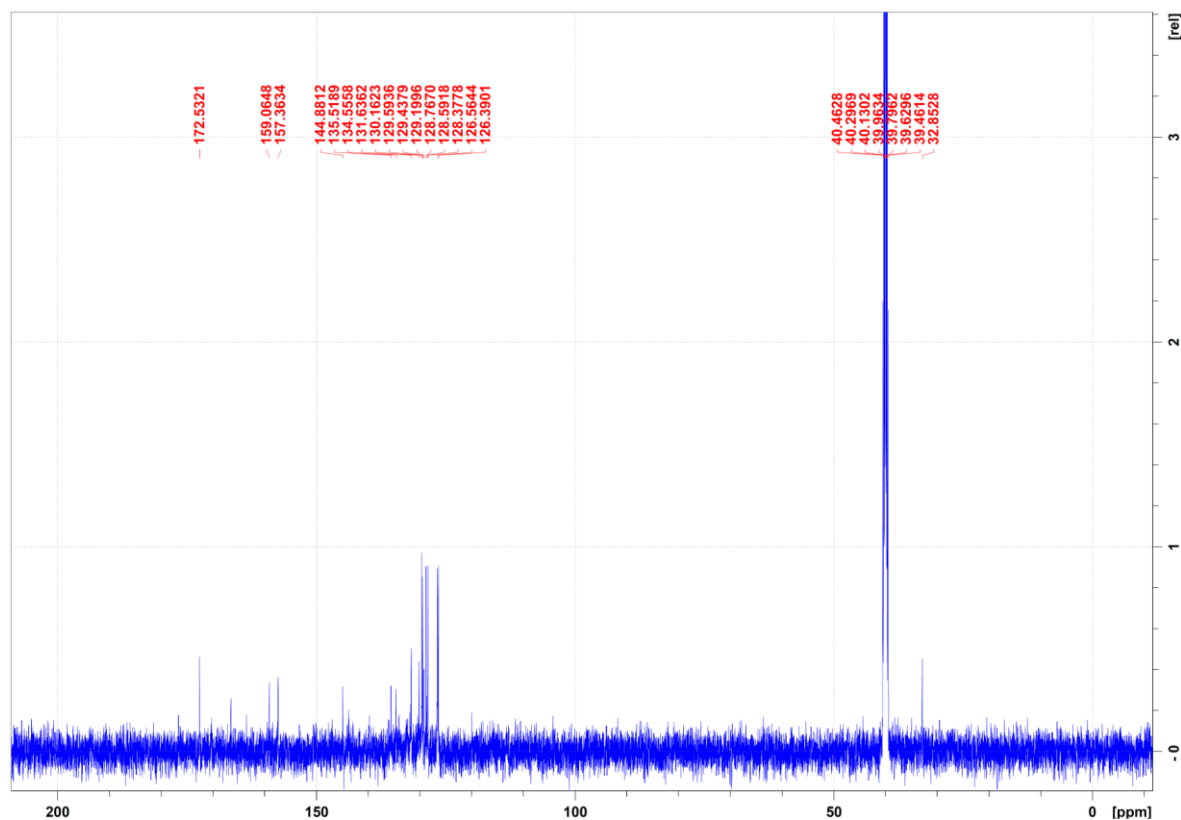Figure 24. <sup>13</sup>C-NMR spectrum of Compound 17.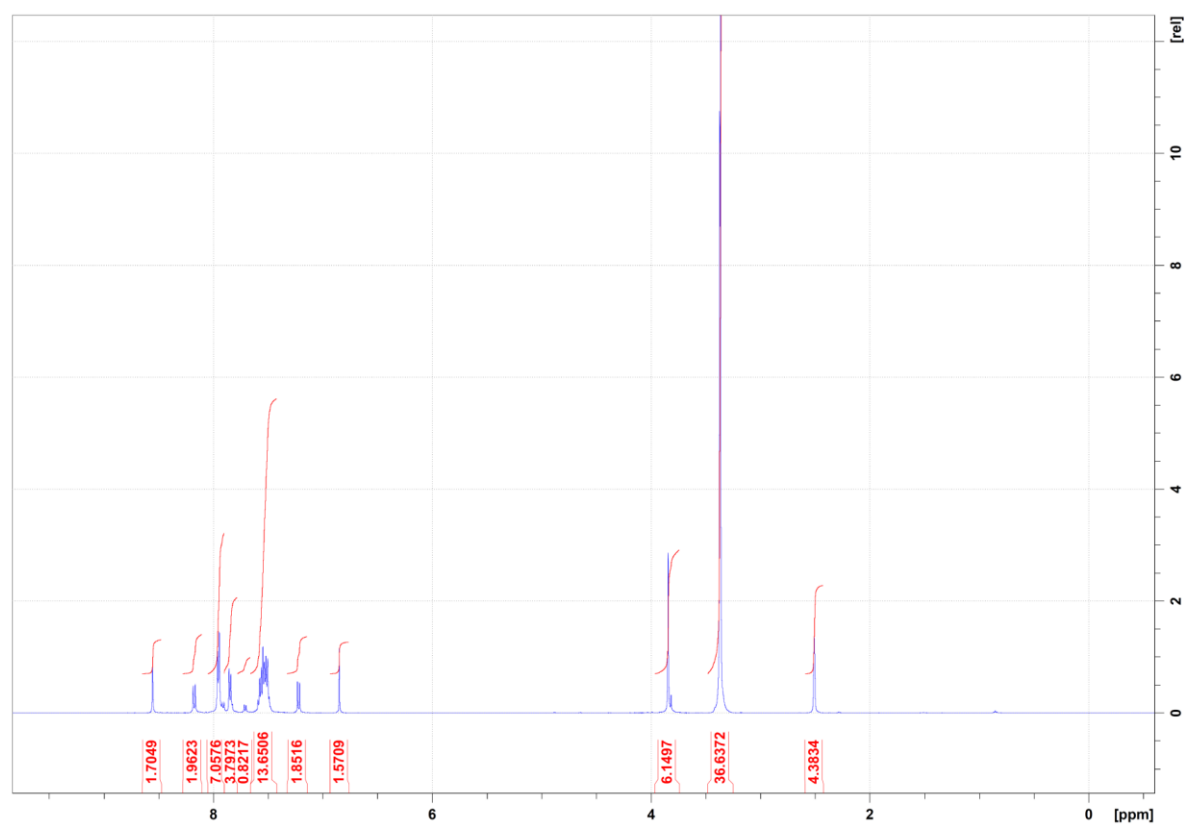Figure 25. <sup>1</sup>H-NMR spectrum of Compound 18.

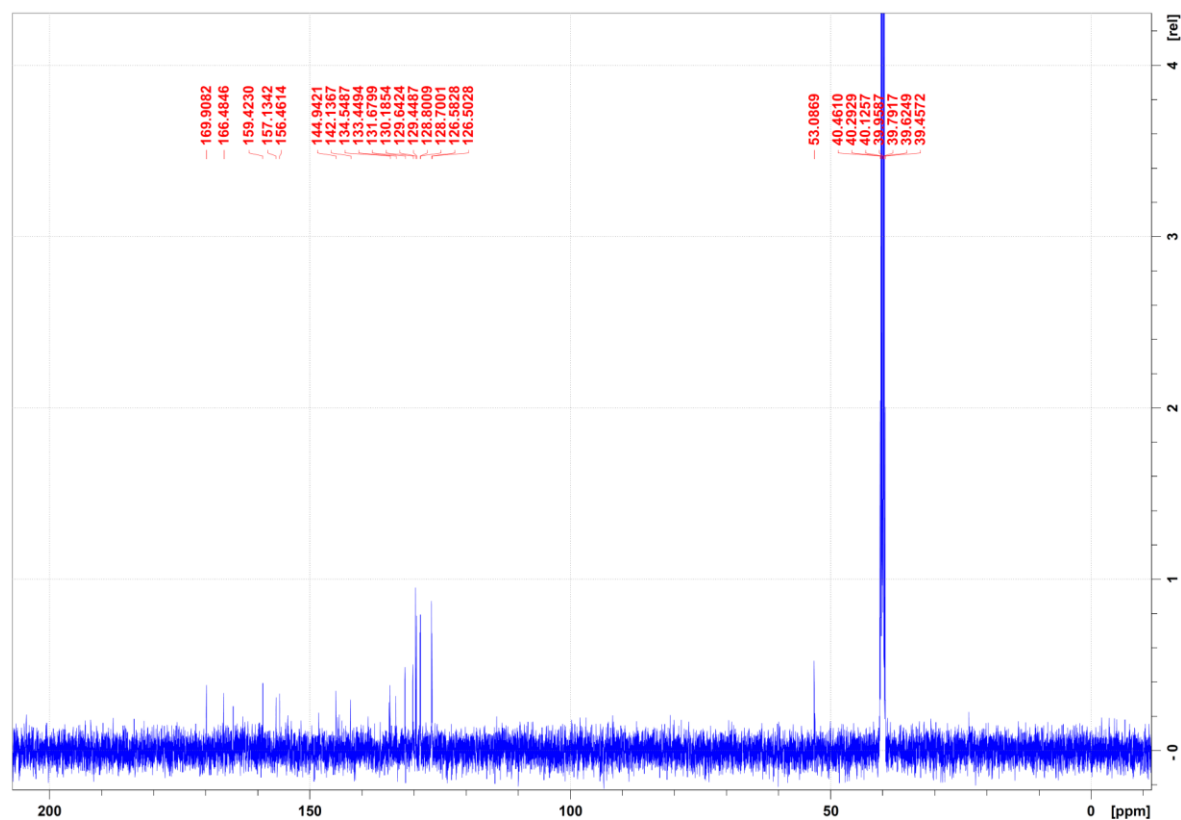

Figure 26.  $^{13}\text{C}$ -NMR spectrum of Compound 18.
